# Supplementary material
Source: PubMed Central journal article supplement (PMC8940650)

**Figure S1: Individual estimated clearance by CYP3A5 metabolizer status standardized at 7.7kg.** Estimated clearance at 7.7kg is calculated for each individual and summarized for normal, intermediate, and poor metabolizers. The hinge is set at the median, the boxes span the 25<sup>th</sup> to 75<sup>th</sup> percentile, the whiskers extend to the most extreme datum which is at most 1.5 times the distance from the interquartile range.

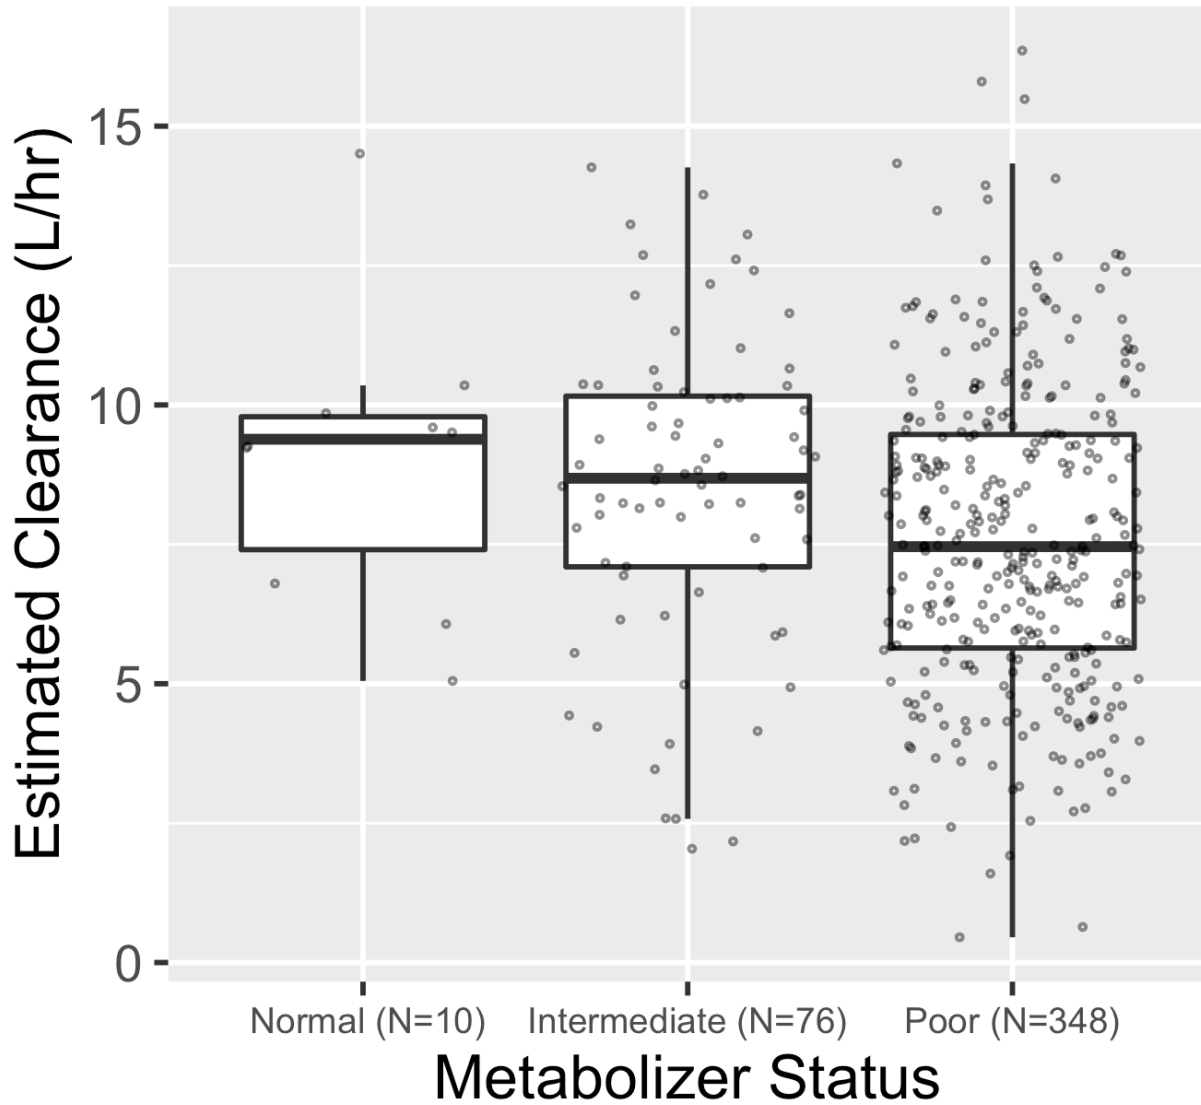

Supplement: NIHMS1762618-supplement-fS1.pdf [file NIHMS1762618-supplement-fS1.pdf]
