# Supplementary material
Source: PubMed Central journal article supplement (PMC8940650)

**Figure S2: Principal components for ancestry informative markers.** Axes correspond to values for the first and second principal components. Self-reported race is specified by point color.

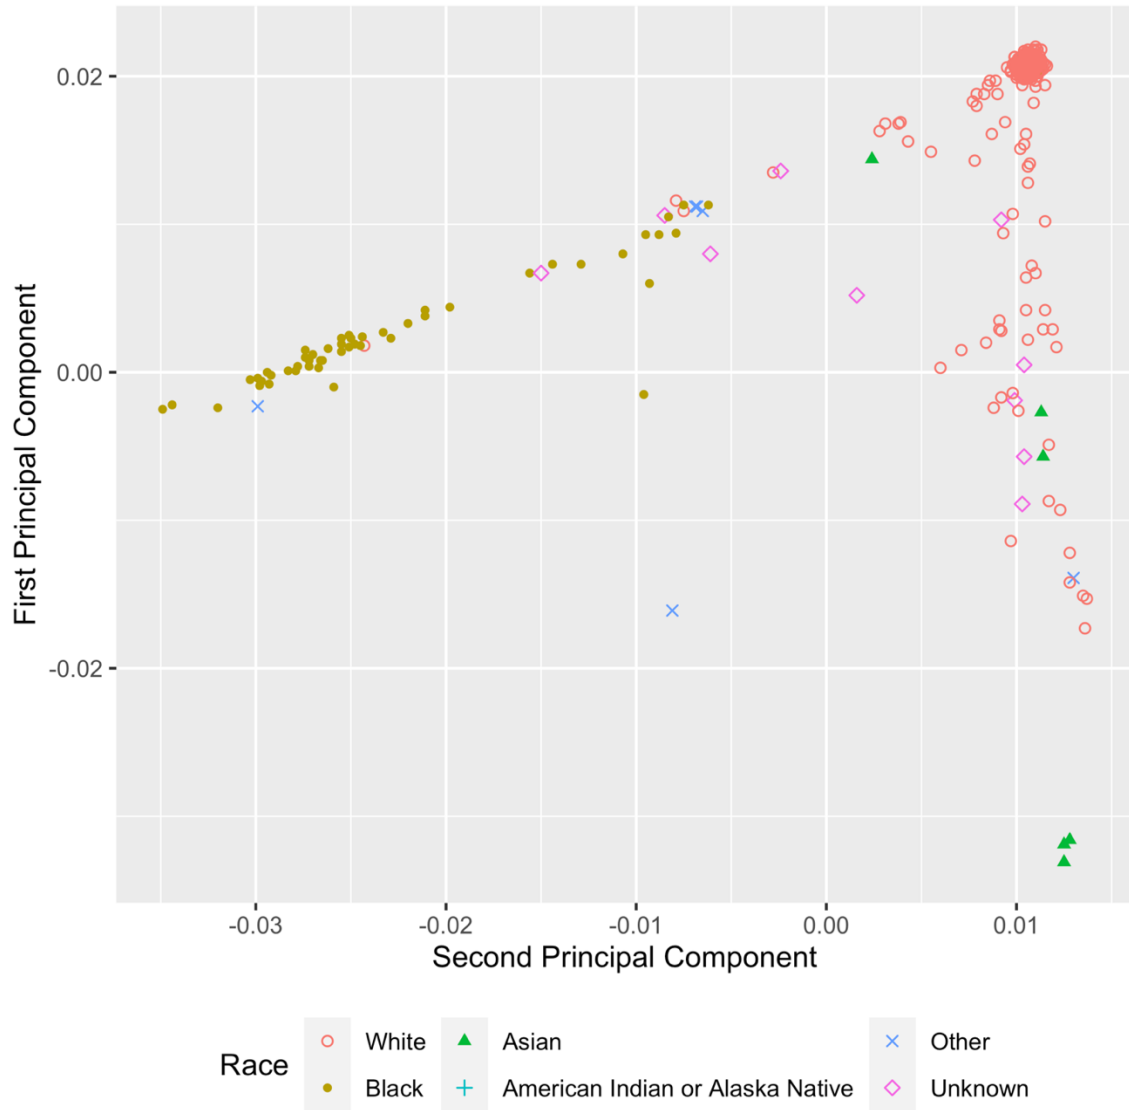

Supplement: NIHMS1762618-supplement-fS2.pdf [file NIHMS1762618-supplement-fS2.pdf]
